## THE EFFECTS OF HYPERCAPNIA ON THE ARTERIAL ACID-BASE STATUS IN THE TEGU LIZARD, *TUPINAMBIS NIGROPUNCTATUS*

BY M. L. GLASS\* AND N. HEISLER

*Abteilung Physiologie, Max-Planck-Institut für experimentelle Medizin,  
D-3400 Göttingen, FRG*

*Accepted 12 December 1985*

### SUMMARY

The effects of hypercapnia on the arterial acid-base status of the Tegu lizard, *Tupinambis nigropunctatus* (Spix), were studied at 25°C. Arterial  $P_{\text{CO}_2}$  increased over the first 2 h of hypercapnia causing a fall in arterial plasma pH ( $\text{pH}_a$ ) of about 0.17 units with  $\approx 4\%$   $\text{CO}_2$  and about 0.3 units with  $\approx 7\%$   $\text{CO}_2$ . In both conditions, plasma pH increased slightly ( $\approx 0.02$  units) between 2 and 72 h. Plasma  $[\text{HCO}_3^-]$  rose during the initial increase of  $\text{Pa}_{\text{CO}_2}$  (by approx.  $5.5 \text{ mmol l}^{-1}$  with  $\approx 7\%$   $\text{CO}_2$ ; approx.  $1.9 \text{ mmol l}^{-1}$  with  $\approx 4\%$   $\text{CO}_2$ ) during the first 2 h, and further increased by  $4 \text{ mmol l}^{-1}$  between 2 and 72 h of hypercapnia, while  $\text{Pa}_{\text{CO}_2}$  did not change. The increases of plasma  $[\text{HCO}_3^-]$  resulted in a recovery of  $\text{pH}_a$  by 38 or 32% ( $\approx 4$  and  $\approx 7\%$   $\text{CO}_2$ , respectively) relative to the fall of  $\text{pH}_a$  that would occur at constant  $[\text{HCO}_3^-]$ .

The limited and incomplete compensation of  $\text{pH}_a$  during environmental hypercapnia is consistent with data for other air-breathing ectothermic vertebrates, and contrasts with the typical response of water-breathing fish, in which compensation is usually complete.

### INTRODUCTION

Several studies have reported that reptiles may regulate their arterial acid-base status by adjustment of  $P_{\text{CO}_2}$  via changes in pulmonary ventilation in response to hypercapnia (Wood & Lenfant, 1976; Jackson, 1978; Glass & Wood, 1983). In contrast, the information on adjustments of arterial pH by changes in plasma bicarbonate concentration ( $[\text{HCO}_3^-]$ ) is scarce in reptiles. This lack of information is surprising, because such data are available for several other groups of ectothermic vertebrates. In water-breathing fish, increased extracellular  $[\text{HCO}_3^-]$  may almost offset the effects of hypercapnia on arterial pH (Heisler, Weitz & Weitz, 1976; Eddy, Lomholt, Weber & Johansen, 1977; Toews, Holeton & Heisler, 1983;

\*Present address: Department of Zoophysiology, University of Aarhus, DK-8000 Aarhus, Denmark.

Heisler, 1984). In contrast, amphibians are incapable of large increases in extracellular  $[\text{HCO}_3^-]$ , and this limits pH restoration during hypercapnia (Toews & Heisler, 1982; Heisler, Forcht, Ultsch & Anderson, 1982).

The present study provides data for the effects of hypercapnia on the arterial acid–base status of a reptile, the Tegu lizard, *Tupinambis nigropunctatus*. It was focused on the time courses of the changes in plasma pH,  $\text{P}_{\text{CO}_2}$  and  $[\text{HCO}_3^-]$  during exposure to elevated environmental  $\text{P}_{\text{CO}_2}$ , and the capability of a reptile to compensate hypercapnia-induced acid–base disturbances by elevations of plasma bicarbonate concentration.

#### MATERIALS AND METHODS

Tegu lizards (*Tupinambis nigropunctatus*) were purchased from a commercial animal supplier. They were kept in large glass terraria for several months before experimentation at temperatures between 35 and 20°C in a day/night cycle of about 12/12 h and the facility to regulate body temperature by behavioural means under infrared radiators. They were fed on mice, rats, beef liver and meat. Experiments were performed on 15 specimens with body weights ranging from 0.81 to 1.33 kg (mean 1.10 kg).

#### *Arterial cannulation*

Anaesthesia of the lizards was initiated by exposure to halothane vapour in a closed glass aquarium (Heisler, Neumann & Maloiy, 1983). After the animals had lost reactivity, a tube was inserted into the trachea *via* the mouth and glottis, and was connected to a small animal respirator equipped with a halothane evaporator. During surgery the lizard was ventilated at normal rates with air containing  $\approx 1\%$  halothane.

The left carotid artery was occlusively cannulated with PE 50 or PE 60 tubing *via* a lateral neck incision (2–3 cm). The catheter was fed out through the skin at a point in front of the skin incision close to the ear of the animal. The incisions were carefully closed by atraumatic sutures and the catheter was firmly fixed to the skin of the neck.

After cannulation a dose of chloramphenicol was administered (20 mg  $\text{kg}^{-1}$ ; i.m.) and the catheters were flushed with heparinized reptile Ringer solution (200 i.u.  $\text{ml}^{-1}$ ; de la Lande, Tyler & Pridmore, 1962) and subsequently flushed again every 12 h. During the recovery period the lizard was artificially ventilated with air until spontaneous breathing efforts were observed (usually after 0.5–1 h). The experiments were initiated 24–48 h after recovery from surgery, at which time the blood acid–base status had returned to control values for at least 20 h. The animal was supplied with drinking water *ad libitum* during recovery as well as during the experiments, whereas food was withheld.

After the experiment, the lizard was again anaesthetized, the catheter was removed and the artery tied off. The skin incision was closed and the lizard treated again with antibiotics. The incision healed without complications, the animals recovered quickly and were kept after this treatment in some cases for much longer than a year.

*Protocol*

The lizard was enclosed in a Plexiglas cylinder (about 20 cm i.d., 60 cm long), but could move freely within the tube. The cylinder was thermostatted at 25°C and shielded against visual disturbances. During experiments the 12/12 h light/dark cycles were continued and the Plexiglas cylinder flushed with air or hypercapnic gas mixtures (about 4 or 7% CO<sub>2</sub> with 20% O<sub>2</sub> and balance N<sub>2</sub>) delivered from a Wösthoff gas mixing pump at about 600 ml min<sup>-1</sup> (Wösthoff GmbH, Bochum, FRG).

After transfer of the animals into the experimental set-up (which was performed at 07.30 h, when the *Tegus* were inactive and relaxed), the experiment was initiated by a 6–26 h control period, during which the arterial pH (pH<sub>a</sub>) was determined repeatedly to assure steady-state conditions. At the end of this period, one or two blood samples were analysed for control pH, P<sub>CO<sub>2</sub></sub>, P<sub>O<sub>2</sub></sub> and [HCO<sub>3</sub><sup>-</sup>]. Then the gas supply to the animal container was switched to one of the hypercapnic gas mixtures (≈4 or ≈7% CO<sub>2</sub>) and blood was sampled and analysed for the above parameters at time 0.5, 1, 2, 4, 6, 8, 24, 48 and 72 h after initiation of hypercapnia. Each animal was exposed to only one of the hypercapnic gas mixtures because the arterial catheters were not patent for a sufficiently long time period.

In order to test the possibility that the bicarbonate accumulation in the extracellular space was limited by the renal H<sup>+</sup> excretion rate, about 5 mmol kg<sup>-1</sup> body weight of bicarbonate was infused intra-arterially over a time period of 1 h into three specimens, after they had been exposed to ≈7% CO<sub>2</sub> for 24 h with continuing hypercapnia, and the acid–base status was monitored during the next 12 h.

Blood analysis for pH, P<sub>CO<sub>2</sub></sub> and P<sub>O<sub>2</sub></sub> was performed by means of electrodes thermostatted to 25°C (BMS 3, Radiometer, Copenhagen, Denmark). The P<sub>CO<sub>2</sub></sub> and P<sub>O<sub>2</sub></sub> electrodes were calibrated before and after each measurement by humidified and thermostatted gas mixtures delivered by gas mixing pumps (Wösthoff, Bochum, FRG), and the pH electrode was calibrated with precision phosphate buffers (Radiometer, Copenhagen). A fraction of each blood sample was centrifuged and the total CO<sub>2</sub> content of the plasma sample was measured by means of a Capni-Con II Total-CO<sub>2</sub>-Analyzer (Cameron Instrument Co., Port Aransas, Texas, USA), which was calibrated with a 20 mmol l<sup>-1</sup> standard sodium bicarbonate solution (for details see Nicol, Glass & Heisler, 1983).

Plasma [HCO<sub>3</sub><sup>-</sup>] was calculated as [CO<sub>2</sub>]<sub>total</sub> - α · Pa<sub>CO<sub>2</sub></sub>, where the solubility of CO<sub>2</sub>, α, was derived from the formula reported by Heisler (1984). (Note: the first sign of the last line term of the α-formula is misprinted in Heisler (1984) and should read '+'.)

## RESULTS

The arterial P<sub>CO<sub>2</sub></sub> of lizards exposed to environmental hypercapnia of ≈4% CO<sub>2</sub> increased from about 20 mmHg during normocapnia to about 32 mmHg within 2 h (Fig. 1), causing pH<sub>a</sub> to fall from 7.59 to 7.41. Concomitantly, [HCO<sub>3</sub><sup>-</sup>] increased

slightly from  $20.8 \text{ mmol l}^{-1}$  during normocapnia to  $22.7 \text{ mmol l}^{-1}$  at 2 h. The apparent plasma buffer value ( $-\Delta[\text{HCO}_3^-]/\Delta\text{pH}_a$ ) calculated from these data is  $13 \text{ mequiv l}^{-1} \text{ pH}^{-1}$ . During later phases of the experiment,  $\text{P}_{\text{CO}_2}$  remained essentially constant at about 33 mmHg, whereas pH and bicarbonate concentrations rose slowly to the final values of 7.43 and  $26.4 \text{ mmol l}^{-1}$ , respectively.

Similar changes were observed during exposure to  $\approx 7\%$   $\text{CO}_2$  in the environmental gas (Fig. 2).  $\text{Pa}_{\text{CO}_2}$  increased from 20 to 48 mmHg during the first 2 h, which was accompanied by a fall in arterial pH from 7.59 to 7.29. Plasma  $[\text{HCO}_3^-]$  rose concomitantly from 21.8 to  $27.3 \text{ mmol l}^{-1}$ , and the apparent plasma buffer value ( $-\Delta[\text{HCO}_3^-]/\Delta\text{pH}_a$ ), was  $17 \text{ mequiv l}^{-1} \text{ pH}^{-1}$ . Arterial  $\text{P}_{\text{CO}_2}$  slowly rose to about 53 mmHg. The further increases in pH and bicarbonate concentration to the final values of 7.31 and  $30.5 \text{ mmol l}^{-1}$  at 72 h of hypercapnia were slower than the time-equivalent rise during 4%  $\text{CO}_2$  exposure. The rise in bicarbonate concentration during the time period from 8 to 72 h after onset of 7%  $\text{CO}_2$  was insignificant, whereas it was highly significant during 4%  $\text{CO}_2$  exposure ( $P < 0.01$ ).

The response of the acid-base status to intra-arterial infusion of bicarbonate was extremely variable among the three individuals. Common features of the response

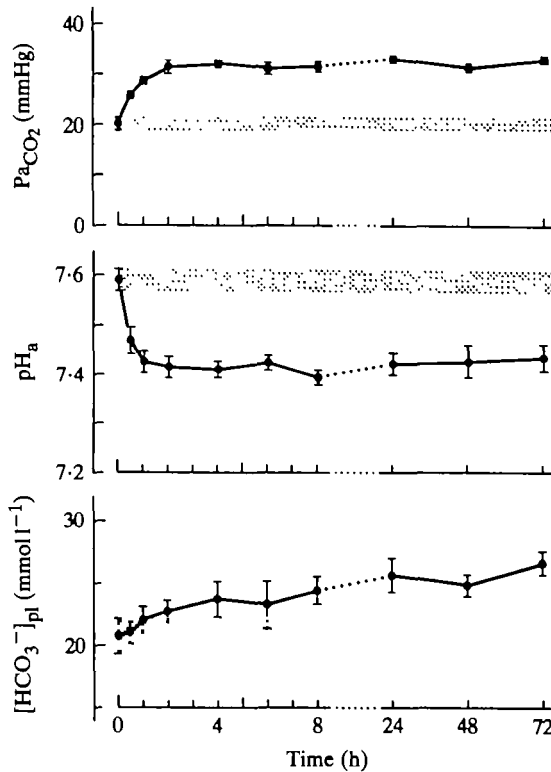

Fig. 1. The effect of hypercapnia on arterial  $\text{P}_{\text{CO}_2}$ , pH and plasma bicarbonate concentration in *Tupinambis* (inspired gas  $\approx 4\%$   $\text{CO}_2$  in air). Mean  $\pm$  s.e.,  $N = 7$  (0–8 h), 6 (24 h), 5 (48 and 72 h).

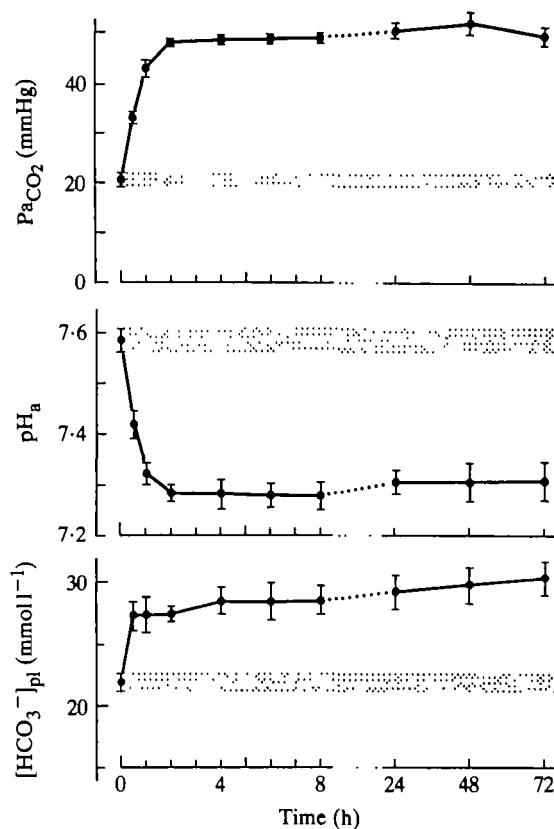

Fig. 2. The effect of hypercapnia on arterial  $P_{CO_2}$ , pH and plasma bicarbonate concentration in *Tupinambis* (inspired gas  $\approx 7\%$   $CO_2$  in air). Mean  $\pm$  s.e.,  $N = 8$  (0–8 h), 6 (24 h), 5 (48 and 72 h).

were an essentially unaffected arterial  $P_{CO_2}$ , a transient rise in plasma bicarbonate concentration to values higher (by up to 50%) than the pre-infusion levels, and plasma pH restoration close to the prehypercapnia control values. This response, however, was only very transient: plasma pH and  $[HCO_3^-]$  gradually decreased again and attained pre-infusion values within the 12 h post-infusion period.

Arterial  $P_{O_2}$  was 66 mmHg during normocapnia and was elevated to 79 mmHg after 1 h of  $\approx 4\%$   $CO_2$ . Inhalation of  $\approx 7\%$   $CO_2$  caused a slight fall of  $P_{aO_2}$  at 0.5 h, before  $P_{aO_2}$  rose to approach 90 mmHg at 2 h. Subsequently,  $P_{aO_2}$  gradually decreased in both 4% and 7%  $CO_2$  and finally reattained the range observed during normocapnia (Fig. 3).

#### DISCUSSION

Exposure of *Tupinambis* to environmental hypercapnia evidently effected a large increase in pulmonary ventilation as indicated by the considerable reduction in the inspired/arterial  $P_{CO_2}$  difference. Arterial  $P_{O_2}$ , however, rose only transiently and by

a smaller amount. This apparent discrepancy has to be attributed to the different slopes of the oxygen and carbon dioxide dissociation curves, and to the probable occurrence of intracardiac net right to left shunting of partially deoxygenated blood, as observed in the lizard *Varanus exanthematicus* (Heisler *et al.* 1983). Such shunting had only a small effect on arterial  $P_{CO_2}$ , but would largely reduce arterial  $P_{O_2}$  on the basis of the flat upper part of the oxygen dissociation curve (cf. Glass, Boutilier & Heisler, 1983, 1985).

The effect of hypercapnia on the arterial acid-base status of *Tupinambis* is characterized by rapid increases in plasma  $P_{CO_2}$ , which are slowly, but only partially, compensated by elevated bicarbonate concentration and thus result in relatively large changes of plasma pH (Fig. 4):

The initial increases of plasma  $[HCO_3^-]$ , which occurred within the first 2 h of the hypercapnia experiment, have to be attributed at least partially to action of the extracellular nonbicarbonate buffers. The apparent real plasma buffer values,  $\beta = -\Delta[HCO_3^-]/\Delta pH_a$ , for the first 2 h were close to the *in vitro* blood buffer value of  $18.9 \text{ mequiv l}^{-1} \text{ pH}^{-1}$  reported for the lizard *Varanus niloticus* by Wood & Johansen (1974), although mechanisms other than passive buffering by the blood

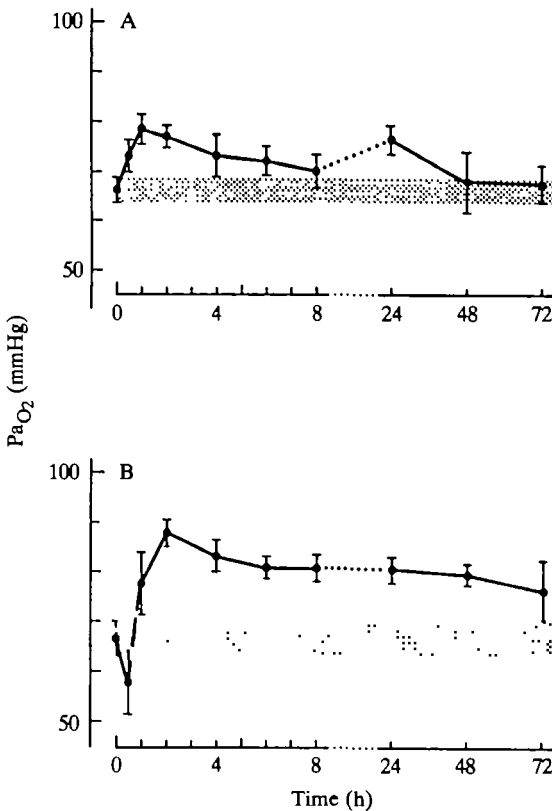

Fig. 3. The effect of different degrees of hypercapnia, (A)  $\approx 4\%$   $CO_2$ ; (B)  $\approx 7\%$   $CO_2$  in the inspired air, on arterial  $P_{O_2}$  in *Tupinambis* ( $\bar{x} \pm \text{s.e.}$ ,  $N$  as for Fig. 1).

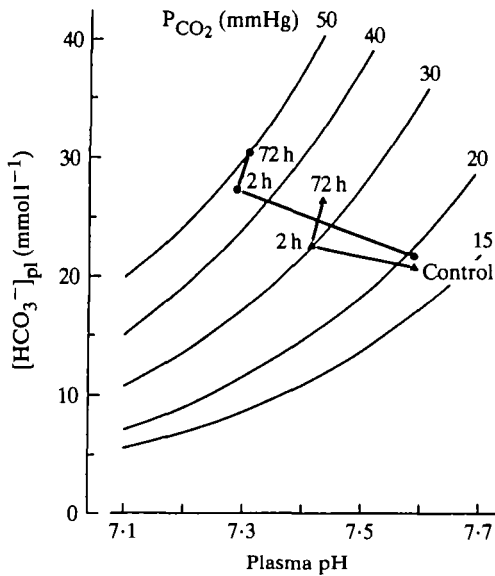

Fig. 4. Presentation of the acid-base status of *Tupinambis* during normocapnia and after 2 and 72 h of hypercapnia displayed in a pH/bicarbonate diagram.  $pK_1'$  values determined from measurements of the present study,  $\alpha_{CO_2}$  values calculated according to Heisler (1984). ( $\blacktriangle$   $\approx$  4%  $CO_2$ ,  $\bullet$   $\approx$  7%  $CO_2$ ).

(i.e. transfer of bicarbonate-equivalent ions between intracellular and extracellular body compartments) may have influenced the *in vivo* slope (cf. Heisler & Piiper, 1972; Lai, Martin, Attebery & Brown, 1973; Heisler, 1985a). It is, however, impossible to quantify such subcomponents from the present data.

The additional increase of  $[HCO_3^-]$  that occurred between 2 and 72 h of hypercapnia has to be attributed to active renal compensation of the rise in  $P_{CO_2}$ , since this process took place at essentially constant  $P_{aCO_2}$  (Fig. 4). It should be noted that this final change is the same for both 4 and 7%  $CO_2$ . The slightly higher bicarbonate concentration finally attained during 7%  $CO_2$  treatment may be attributed to the slightly higher control values (20.8 vs 21.8  $mmol\ l^{-1}$ ) and to the initially larger production of bicarbonate by nonbicarbonate buffering in the extracellular compartment.

The extent of the final pH recovery (active and passive components) during both hypercapnic conditions is in the range of 30–40%, i.e. the fall in arterial pH is 30–40% less than that which would have occurred if  $[HCO_3^-]$  had remained constant at prehypercapnic control values.

There are few comparable observations from other reptiles, since the effect of hypercapnia has never been studied for longer than a few hours of exposure. Data sets, for normocapnic lizards, however, are consistent with our control measurements during normocapnia (Table 1).

The effects of hypercapnia have been studied in the red-eared turtle *Pseudemys scripta* (Jackson, Palmer & Meadow, 1974). As in other turtle species, the

normocapnic  $[\text{HCO}_3^-]$  level is higher than in lizards (cf. Howell & Rahn, 1976), but the increases in  $[\text{HCO}_3^-]$  during 3 h of  $\text{CO}_2$  inhalation were small, as were those described in *Tupinambis*.

The present data for *Tupinambis* resemble those reported for amphibians, in which the plasma pH compensation during hypercapnia is rather limited (Boutilier, Randall, Shelton & Toews, 1979; Boutilier & Toews, 1981; Toews & Heisler, 1982; Heisler *et al.* 1982; for review see Heisler, 1985c). In particular, the effects of hypercapnia in the toad *Bufo marinus* are strikingly similar to those measured in *Tupinambis*. The total compensation of  $\text{pH}_a$  after 24 h of 5%  $\text{CO}_2$  was 30%, compared to  $\approx 33\%$  in *Tupinambis* after 24 h of  $\approx 7\%$   $\text{CO}_2$  (Toews & Heisler, 1982). Also, in urodele amphibians the compensation of  $\text{pH}_a$  during elevated  $\text{PaCO}_2$  is small (Boutilier & Toews, 1981) and even absent in *Siren* and *Amphiuma* (Heisler *et al.* 1982).

A small or only limited compensation of plasma pH by accumulation of  $\text{HCO}_3^-$  in the extracellular compartment is characteristic of air-breathing ectothermic vertebrates. This also applies to air-breathing fishes such as the African lungfish *Protopterus aethiopicus* (DeLaney, Lahiri & Fishman, 1974; DeLaney, Lahiri, Hamilton & Fishman, 1977), which develops a severe respiratory acidosis during aestivation. The recovery of  $\text{pH}_a$  is slow and only partial. As indicated by the concentration changes of the other plasma electrolytes, the increase in bicarbonate concentration in this species has to be attributed to plasma water loss as a result of desiccation, rather than to bicarbonate gained from active transepithelial ion transfer processes relevant to the acid-base status.

Table 1. Arterial acid-base status of selected reptiles at 25°C

| Species                           | pH                 | $\text{PaCO}_2$<br>(mmHg) | $[\text{HCO}_3^-]$<br>(mmol l <sup>-1</sup> ) | Reference                      |
|-----------------------------------|--------------------|---------------------------|-----------------------------------------------|--------------------------------|
| Lacertilia                        |                    |                           |                                               |                                |
| <i>Tupinambis nigropunctatus</i>  | 7.59<br>$\pm 0.01$ | 20.3<br>$\pm 0.7$         | 21.0<br>$\pm 0.6$                             | This study                     |
| <i>Varanus exanthematicus</i>     | 7.55               | 17.1                      | 17.9                                          | Wood, Glass & Johansen (1977)  |
| <i>Sauromalus obesus</i>          | 7.39               | 26                        | 14                                            | Crawford & Gatz (1974)         |
| Ophidia                           |                    |                           |                                               |                                |
| <i>Coluber constrictor</i>        | 7.56               | 18.6                      | 20.1                                          | Nolan & Frankel (1982)         |
| Crocodilia                        |                    |                           |                                               |                                |
| <i>Alligator mississippiensis</i> | 7.49               | 17.9                      | 15.2                                          | Davies (1978)                  |
| Chelonia                          |                    |                           |                                               |                                |
| <i>Chrysemys picta bellii</i>     | 7.70               | 29.1                      | 42.7                                          | Nicol, Glass & Heisler (1983)* |

For *Tupinambis*:  $\bar{x} \pm \text{s.e.}$ ;  $N = 15$ .

\*The data for *Chrysemys* are interpolated from measurements at 20 and 30°C. The plasma bicarbonate concentrations were directly measured as in the present study, whereas the values from the other studies are indirectly determined from  $\text{pH}_a$  and  $\text{PaCO}_2$ .



The tropical freshwater teleost *Synbranchus marmoratus* lacks any compensation of the rise in  $P_{\text{CO}_2}$  from about 6 mmHg during water-breathing to 26 mmHg during air-breathing. Plasma pH is reduced accordingly without any persistent elevation of plasma  $[\text{HCO}_3^-]$  (Heisler, 1982).

In contrast to air-breathing ectotherms, exclusively water-breathing fish compensate hypercapnic disturbances of the acid–base status almost completely by large increases of plasma  $[\text{HCO}_3^-]$  (for reviews see Heisler, 1984, 1985*b*). This compensation of plasma pH during hypercapnia is particularly fast and complete in marine fish including both elasmobranchs (e.g. Heisler *et al.* 1976) and teleosts (e.g. Toews *et al.* 1983).

The striking differences between air- and water-breathing ectothermic vertebrates in their response to hypercapnic acid–base disturbances are correlated with differences in the pattern of the normocapnic acid–base status. Aerial respiration is usually coupled with considerably higher values for  $P_{\text{aCO}_2}$  and plasma  $[\text{HCO}_3^-]$  than are found in water-breathing animals. In contrast, plasma pH is very similar in these two groups of animals (Robin, Bromberg & Cross, 1969; Rahn, Wangenstein & Farhi, 1971; Dejours, 1975; Heisler, 1982).

Limited compensation of hypercapnia in air-breathing lower vertebrates may be attributed to a number of factors. As can easily be derived from the Henderson–Hasselbalch equation, if the plasma bicarbonate concentration is at a higher level during normocapnia, then much larger quantities of bicarbonate must be accumulated in order to compensate a given rise in  $P_{\text{CO}_2}$ . These larger quantities, however, may not be available to the animals, or the accumulation of these amounts may cause disturbances in the electrolyte balance which are too large to be tolerated (cf. Heisler, 1982). The almost fivefold rise of  $P_{\text{CO}_2}$  in *Synbranchus* during transition from water- to air-breathing, for example, would require elevation of the bicarbonate concentration from 24 to 111  $\text{mmol l}^{-1}$  for complete restoration of plasma pH (cf. Heisler, 1982). Such elevation would imply reduction of the  $[\text{Cl}^-]$  to values close to zero, which certainly interferes with electrophysiological mechanisms (e.g. Tauc & Gerschenfeld, 1961; Strumwasser, 1962; see also Eccles, 1964).

The availability of bicarbonate, and the electrolyte disturbances induced by bicarbonate accumulation, however, are apparently not the ultimate factors to limit extracellular pH compensation in air breathers. When all available data on the acid–base regulation during hypercapnia are critically reviewed, it becomes evident that certain plasma bicarbonate concentrations are never surpassed, irrespective of the extent of hypercapnia (Heisler, 1985*c*). These thresholds are species-specific, but seem to vary to only a limited extent within animal classes. For fish the threshold is in the range of 22–27  $\text{mmol l}^{-1}$ , for amphibians 22–33  $\text{mmol l}^{-1}$ , and for higher vertebrates 40–50  $\text{mmol l}^{-1}$  (Heisler, 1985*c*).

The data obtained for *Tupinambis* in the present study are in accordance with these threshold values of other animal classes. *Tupinambis* does not increase the plasma bicarbonate concentration, even after 72 h of hypercapnia, beyond about 30  $\text{mmol l}^{-1}$ , and further demands on the acid–base regulatory system by exposure to higher concentrations of  $\text{CO}_2$  do not significantly elevate plasma  $[\text{HCO}_3^-]$ .

The net gain of bicarbonate by excretion of  $H^+$  ions to, or direct uptake of  $HCO_3^-$  from, the environment is limited by various factors in fishes and amphibians (Heisler, 1985*b,c*). It could be argued that factors such as insufficient environmental ion concentrations would be responsible for the observed limitation in the elevation of plasma bicarbonate concentration. It was demonstrated, however, that gradual increases in sodium and bicarbonate concentration in the environmental water of the anuran amphibian *Siren* (Heisler *et al.* 1982) and of the freshwater teleost fish *Cyprinus* (Claiborne & Heisler, 1984) did not enhance the compensation of hypercapnia. Also, direct infusion into these animals raised plasma bicarbonate concentration only transiently, before the bicarbonate was quantitatively excreted to the environmental water.

Although terrestrial species such as *Tupinambis* gain bicarbonate by renal mechanisms, which are independent of environmental factors, the rate of bicarbonate gain could be too small to result in higher bicarbonate concentration values than observed during the experimental time period of the present study. In *Tupinambis* intra-arterial infusion of bicarbonate, however, resulted in an only transient increase of plasma bicarbonate concentration, before the original values were restored.

We conclude that the threshold for the mechanisms for retaining and resorbing bicarbonate in the reptile *Tupinambis* is similar to that described for other classes of animals. This threshold is responsible for the loss of infused bicarbonate when the maximal level has been attained, and the observed rather poor compensation of hypercapnic acid-base disturbances in this species.

The skilful technical assistance of Mr G. Forcht and Mrs S. Glage is gratefully acknowledged. This study was supported by the Danish Natural Science Research Council, by the Alexander von Humboldt-Stiftung and by Deutsche Forschungsgemeinschaft.

#### REFERENCES

- BOUTILIER, R. G., RANDALL, D. J., SHELTON, G. & TOEWS, D. P. (1979). Acid-base relationships in the blood of the toad *Bufo marinus*. I. The effects of environmental  $CO_2$ . *J. exp. Biol.* **82**, 331-344.
- BOUTILIER, R. G. & TOEWS, D. P. (1981). Respiratory, circulatory and acid-base adjustments to hypercapnia in a strictly aquatic and predominantly skin-breathing urodele, *Cryptobranchus alleganiensis*. *Respir. Physiol.* **46**, 177-192.
- CLAIBORNE, J. B. & HEISLER, N. (1984). Acid-base regulation and ion transfers in the carp (*Cyprinus carpio*) during and after exposure to environmental hypercapnia. *J. exp. Biol.* **108**, 25-43.
- CRAWFORD, E. C., JR & GATZ, R. N. (1974). Carbon dioxide tension and pH of the blood of the lizard *Sauromalus obesus* at different body temperatures. *Comp. Biochem. Physiol.* **47A**, 529-534.
- DAVIES, D. G. (1978). Temperature-induced changes in acid-base status in the alligator, *Alligator mississippiensis*. *J. appl. Physiol.* **45**, 922-926.
- DEJOURS, P. (1975). *Principles of Comparative Respiratory Physiology*. Amsterdam, Oxford, New York: North-Holland/American Elsevier.

- DE LA LANDE, J. S., TYLER, M. J. & PRIDMORE, B. J. (1962). Pharmacology of the heart of *Tiliqua (Trachysaurus) rugosa* (the sleepy lizard). *Aust. J. exp. Biol. med. Sci.* **40**, 129–137.
- DELANEY, R. G., LAHIRI, S. & FISHMAN, A. P. (1974). Aestivation of the African Lungfish *Protopterus aethiopicus*: cardiovascular and respiratory functions. *J. exp. Biol.* **61**, 111–128.
- DELANEY, R. G., LAHIRI, S., HAMILTON, R. & FISHMAN, A. P. (1977). Acid–base balance and plasma composition in the aestivating lungfish (*Protopterus*). *Am. J. Physiol.* **232**, R10–R17.
- ECCLES, J. C. (1964). *The Physiology of the Synapses*. New York: Springer-Verlag.
- EDDY, F. B., LOMHOLT, J. P., WEBER, R. E. & JOHANSEN, K. (1977). Blood respiratory properties of rainbow trout (*Salmo gairdneri*) kept in water of high CO<sub>2</sub> tension. *J. exp. Biol.* **67**, 37–47.
- GLASS, M. L., BOUTILIER, R. G. & HEISLER, N. (1983). Ventilatory control of arterial P<sub>O<sub>2</sub></sub> in the turtle *Chrysemys picta bellii*: effects of temperature and hypoxia. *J. comp. Physiol.* **151**, 145–153.
- GLASS, M. L., BOUTILIER, R. G. & HEISLER, N. (1985). Effects of body temperature on respiration, blood gases and acid–base status in the turtle *Chrysemys picta bellii*. *J. exp. Biol.* **114**, 37–51.
- GLASS, M. L. & WOOD, S. C. (1983). Gas exchange and control of breathing in reptiles. *Physiol. Rev.* **63**, 232–260.
- HEISLER, N. (1982). Intracellular and extracellular acid–base regulation in the tropical fresh-water teleost fish *Synbranchus marmoratus* in response to the transition from water breathing to air breathing. *J. exp. Biol.* **99**, 9–28.
- HEISLER, N. (1984). Acid–base regulation in fishes. In *Fish Physiology*, vol. X A (ed. W. S. Hoar & D. J. Randall), pp. 315–340. New York, London: Academic Press.
- HEISLER, N. (1985a). Buffering and transmembrane ion transfer processes. In *Acid–Base Regulation in Animals* (ed. N. Heisler), pp. 3–47. Amsterdam: Elsevier Biomedical Press.
- HEISLER, N. (1985b). Fishes. In *Acid–Base Regulation in Animals* (ed. N. Heisler), pp. 309–356. Amsterdam: Elsevier Biomedical Press.
- HEISLER, N. (1985c). Comparative aspects of acid–base regulation. In *Acid–Base Regulation in Animals* (ed. N. Heisler), pp. 397–450. Amsterdam: Elsevier Biomedical Press.
- HEISLER, N., FORCHT, G., ULTSCH, G. R. & ANDERSON, J. F. (1982). Acid–base regulation in response to environmental hypercapnia in two aquatic salamanders, *Siren lacertina* and *Amphiuma means*. *Respir. Physiol.* **49**, 141–158.
- HEISLER, N., NEUMANN, P. & MALOY, G. M. O. (1983). The mechanism of intracardiac shunting in the lizard *Varanus exanthematicus*. *J. exp. Biol.* **105**, 15–33.
- HEISLER, N. & PIIPER, J. (1972). Determination of intracellular buffering properties in rat diaphragm muscle. *Am. J. Physiol.* **222**, 747–753.
- HEISLER, N., WEITZ, H. & WEITZ, A. M. (1976). Hypercapnia and resultant bicarbonate transfer processes in a elasmobranch fish (*Scyliorhinus stellaris*). *Bull. Europ. Physiopath. Resp.* **12**, 77–85.
- HOWELL, B. J. & RAHN, H. (1976). Regulation of acid–base balance in reptiles. In *Biology of the Reptilia*, vol. 5, Physiology A (ed. C. Gans & W. R. Dawson). London: Academic Press.
- JACKSON, D. C. (1978). Respiratory control and CO<sub>2</sub>-conductance: temperature effects in a turtle and a frog. *Respir. Physiol.* **33**, 103–114.
- JACKSON, D. C., PALMER, S. E. & MEADOW, W. L. (1974). The effects of temperature and carbon dioxide breathing on ventilation and acid–base status of turtles. *Respir. Physiol.* **20**, 131–146.
- LAI, Y. L., MARTIN, E. D., ATTEBERY, B. A. & BROWN, E. B., JR (1973). Mechanisms of extracellular pH adjustments in hypercapnia. *Respir. Physiol.* **19**, 107–114.
- NICOL, S. C., GLASS, M. L. & HEISLER, N. (1983). Comparison of directly determined and calculated plasma bicarbonate concentration in the turtle *Chrysemys picta bellii* at different temperatures. *J. exp. Biol.* **107**, 521–525.
- NOLAN, W. F. & FRANKEL, H. M. (1982). Effects of temperature on ventilation and acid–base status in the black racer snake *Coluber constrictor*. *Comp. Biochem. Physiol.* **73A**, 57–61.
- RAHN, H., WANGENSTEEN, O. D. & FARHI, L. E. (1971). Convection and diffusion gas exchange in air or water. *Respir. Physiol.* **12**, 1–6.
- ROBIN, E. D., BROMBERG, P. A. & CROSS, C. E. (1969). Some aspects of the evolution of vertebrate acid–base regulation. *Yale J. Biol. Med.* **41**, 448–467.

- STRUMWASSER, F. (1962). Post-synaptic inhibition and excitation produced by different branches of a single neuron and the common transmitter involved. *XXII Intern. Congr. physiol. Sci.* **2**, no. 801.
- TAUC, L. & GERSCHENFELD, H. M. (1961). Cholinergic transmission mechanisms for both excitation and inhibition in molluscan central synapses. *Nature, Lond.* **192**, 366–367.
- TOEWS, D. P. & HEISLER, N. (1982). The effects of hypercapnia on intracellular and extracellular acid–base status in the toad *Bufo marinus*. *J. exp. Biol.* **97**, 79–86.
- TOEWS, D. P., HOLETON, G. F. & HEISLER, N. (1983). Regulation of acid–base status during environmental hypercapnia in the marine teleost fish *Conger conger*. *J. exp. Biol.* **107**, 9–20.
- WOOD, S. C. & JOHANSEN, K. (1974). Respiratory adaptation to diving in the Nile monitor lizard *Varanus niloticus*. *J. comp. Physiol.* **89**, 145–158.
- WOOD, S. C. & LENFANT, C. (1976). Respiration: mechanics, control and gas exchange. In *Biology of the Reptilia*, vol. 5, Physiology A (ed. C. Gans & W. R. Dawson). New York: Academic Press.
- WOOD, S. C., GLASS, M. L. & JOHANSEN, K. (1977). Effects of temperature on respiration and acid–base balance in a monitor lizard. *J. comp. Physiol.* **116**, 287–296.
